# Supplementary material for: Using Electroencephalogram-Extracted Nonlinear Complexity and Wavelet-Extracted Power Rhythm Features during the Performance of Demanding Cognitive Tasks (Aristotle’s Syllogisms) in Optimally Classifying Patients with Anorexia Nervosa
Source: MDPI journal article supplement (doi:10.3390/brainsci14030251), 2024-03-04
Supplement: s1 [file s1]

## SUPPLEMENTARY MATERIAL

**Table S1:** Descriptive Statistics of Grand Mean (across all channels) of AppEn (per group).

|          | Valid   |        | Invalid |        | Paradox |        |
|----------|---------|--------|---------|--------|---------|--------|
|          | Control | AN     | Control | AN     | Control | AN     |
| Mean     | 1.371   | 1.259  | 1.482   | 1.210  | 1.389   | 1.283  |
| St.Dev   | 0.401   | 0.130  | 0.207   | 0.201  | 0.335   | 0.099  |
| Min      | 0.080   | 0.958  | 0.733   | 0.671  | 0.180   | 1.117  |
| Max      | 1.727   | 1.408  | 1.742   | 1.415  | 1.674   | 1.403  |
| Skewness | -1.891  | -1.316 | -2.125  | -1.866 | -2.237  | -0.617 |
| Kurtosis | 3.159   | 1.513  | 5.830   | 4.541  | 5.651   | -1.200 |

**Table S2:** Descriptive Statistics of Grand Mean (across all channels) of AppEn (per gender).

|          | Valid  |        | Invalid |        | Paradox |        |
|----------|--------|--------|---------|--------|---------|--------|
|          | Male   | Female | Male    | Female | Male    | Female |
| Mean     | 1.342  | 1.337  | 1.413   | 1.383  | 1.353   | 1.357  |
| St.Dev   | 0.346  | 0.349  | 0.087   | 0.249  | 0.372   | 0.280  |
| Min      | 0.734  | 0.080  | 1.438   | 0.671  | 0.697   | 0.180  |
| Max      | 1.567  | 1.727  | 1.650   | 1.742  | 1.586   | 1.674  |
| Skewness | -2.037 | -1.820 | 0.563   | -1.136 | -2.061  | -2.256 |
| Kurtosis | 4.242  | 4.114  | 0.476   | 1.454  | 4.377   | 8.144  |

**Table S3:** Normality test for Grand Mean (across all channels) of AppEn (per group).

### Tests of Normality

|                 |         | Kolmogorov-Smirnov <sup>a</sup> |    |        | Shapiro-Wilk |    |       |
|-----------------|---------|---------------------------------|----|--------|--------------|----|-------|
|                 |         | Statistic                       | df | Sig.   | Statistic    | df | Sig.  |
| mean_valid_AE   | Control | 0.293                           | 28 | 0.000  | 0.743        | 28 | 0.000 |
|                 | ED      | 0.231                           | 12 | 0.078  | 0.884        | 12 | 0.099 |
| mean_invalid_AE | Control | 0.186                           | 28 | 0.014  | 0.802        | 28 | 0.000 |
|                 | ED      | 0.200                           | 12 | 0.200* | 0.826        | 12 | 0.019 |
| mean_paradox_AE | Control | 0.244                           | 28 | 0.000  | 0.738        | 28 | 0.000 |
|                 | ED      | 0.237                           | 12 | 0.062  | 0.873        | 12 | 0.070 |

\*. This is a lower bound of the true significance.

a. Lilliefors Significance Correction

**Table S4:** Normality test for Grand Mean (across all channels) of AppEn (per gender).

**Tests of Normality**

|                 | gender | Kolmogorov-Smirnov <sup>a</sup> |    |        | Shapiro-Wilk |    |       |
|-----------------|--------|---------------------------------|----|--------|--------------|----|-------|
|                 |        | Statistic                       | df | Sig.   | Statistic    | df | Sig.  |
| mean_valid_AE   | Male   | 0.355                           | 5  | 0.038  | 0.721        | 5  | 0.016 |
|                 | Female | 0.187                           | 35 | 0.003  | 0.834        | 35 | 0.000 |
| mean_invalid_AE | Male   | 0.225                           | 5  | 0.200* | 0.895        | 5  | 0.381 |
|                 | Female | 0.118                           | 35 | 0.200* | 0.914        | 35 | 0.010 |
| mean_paradox_AE | Male   | 0.397                           | 5  | 0.010  | 0.700        | 5  | 0.010 |
|                 | Female | 0.163                           | 35 | 0.019  | 0.806        | 35 | 0.000 |

\*. This is a lower bound of the true significance.

a. Lilliefors Significance Correction

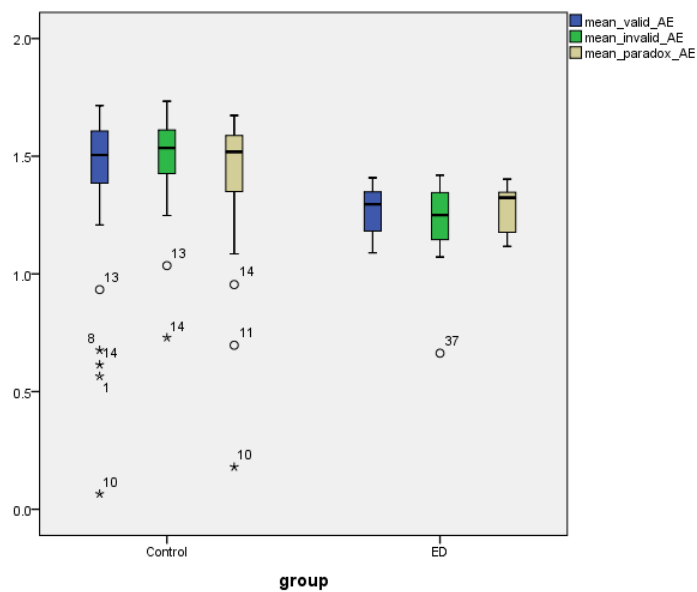

**Figure S1:** Box plot of the distribution of the Grand Mean (across all channels) of the AppEn (per group).

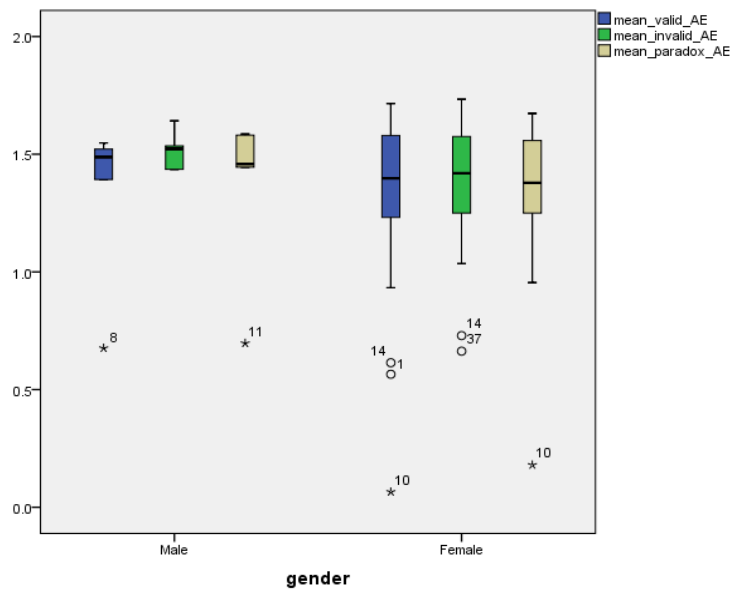

**Figure S2:** Box plot of the distribution of the Grand Mean (across all channels) of the AppEn (per gender).

**Table S5:** Descriptive Statistics of Grand Mean (across all channels) of Higuchi FD, per group.

|          | Valid   |       | Invalid |       | Paradox |        |
|----------|---------|-------|---------|-------|---------|--------|
|          | Control | AN    | Control | AN    | Control | AN     |
| Mean     | 1.679   | 1.755 | 1.703   | 1.726 | 1.715   | 1.726  |
| St.Dev   | 0.102   | 0.079 | 0.084   | 0.105 | 0.084   | 0.092  |
| Min      | 1.488   | 1.639 | 1.544   | 1.543 | 1.574   | 1.594  |
| Max      | 1.887   | 1.905 | 1.968   | 1.910 | 1.967   | 1.888  |
| Skewness | -0.299  | 0.393 | 0.789   | 0.337 | 0.722   | 0.347  |
| Kurtosis | -0.519  | 0.637 | 2.294   | 0.123 | 1.620   | -0.829 |

**Table S6:** Descriptive Statistics of Grand Mean (across all channels) of Higuchi FD, per gender.

|          | Valid  |        | Invalid |        | Paradox |        |
|----------|--------|--------|---------|--------|---------|--------|
|          | Male   | Female | Male    | Female | Male    | Female |
| Mean     | 1.641  | 1.710  | 1.684   | 1.714  | 1.677   | 1.724  |
| St.Dev   | 0.079  | 0.102  | 0.065   | 0.094  | 0.050   | 0.088  |
| Min      | 1.546  | 1.488  | 1.618   | 1.543  | 1.606   | 1.574  |
| Max      | 1.723  | 1.905  | 1.752   | 1.968  | 1.728   | 1.967  |
| Skewness | -0.356 | -0.418 | 0.293   | 0.579  | -0.741  | 0.480  |
| Kurtosis | -2.697 | -0.003 | -3.050  | 0.940  | -1.265  | 0.326  |

**Table S7:** Normality test for Grand Mean (across all channels) of Higuchi FD (per group).

**Tests of Normality**

|                      |         | Kolmogorov-Smirnov <sup>a</sup> |    |        | Shapiro-Wilk |    |       |
|----------------------|---------|---------------------------------|----|--------|--------------|----|-------|
|                      |         | Statistic                       | df | Sig.   | Statistic    | df | Sig.  |
| mean_valid_higuchi   | Control | 0.116                           | 28 | 0.200* | 0.971        | 28 | 0.601 |
|                      | ED      | 0.116                           | 12 | 0.200* | 0.974        | 12 | 0.951 |
| mean_invalid_higuchi | Control | 0.129                           | 28 | 0.200* | 0.946        | 28 | 0.158 |
|                      | ED      | 0.188                           | 12 | 0.200* | 0.945        | 12 | 0.562 |
| mean_paradox_higuchi | Control | 0.085                           | 28 | 0.200* | 0.957        | 28 | 0.288 |
|                      | ED      | 0.134                           | 12 | 0.200* | 0.956        | 12 | 0.732 |

\*. This is a lower bound of the true significance.

a. Lilliefors Significance Correction

**Table S8:** Normality test for Grand Mean (across all channels) of Higuchi FD (per gender).

**Tests of Normality**

|                      |        | Kolmogorov-Smirnov <sup>a</sup> |    |        | Shapiro-Wilk |    |       |
|----------------------|--------|---------------------------------|----|--------|--------------|----|-------|
|                      |        | Statistic                       | df | Sig.   | Statistic    | df | Sig.  |
| mean_valid_higuchi   | Male   | 0.214                           | 5  | 0.200* | 0.893        | 5  | 0.373 |
|                      | Female | 0.080                           | 35 | 0.200* | 0.974        | 35 | 0.563 |
| mean_invalid_higuchi | Male   | 0.249                           | 5  | 0.200* | 0.829        | 5  | 0.138 |
|                      | Female | 0.122                           | 35 | 0.200* | 0.959        | 35 | 0.210 |
| mean_paradox_higuchi | Male   | 0.267                           | 5  | 0.200* | 0.915        | 5  | 0.497 |
|                      | Female | 0.075                           | 35 | 0.200* | 0.975        | 35 | 0.598 |

\*. This is a lower bound of the true significance.

a. Lilliefors Significance Correction

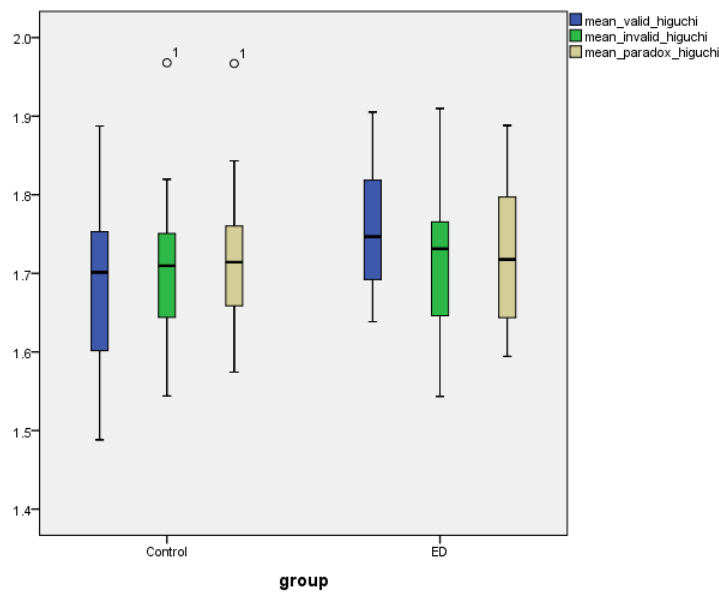

**Figure S3:** Box plot of the distribution of the Grand Mean (across all channels) of the Higuchi FD (per group).

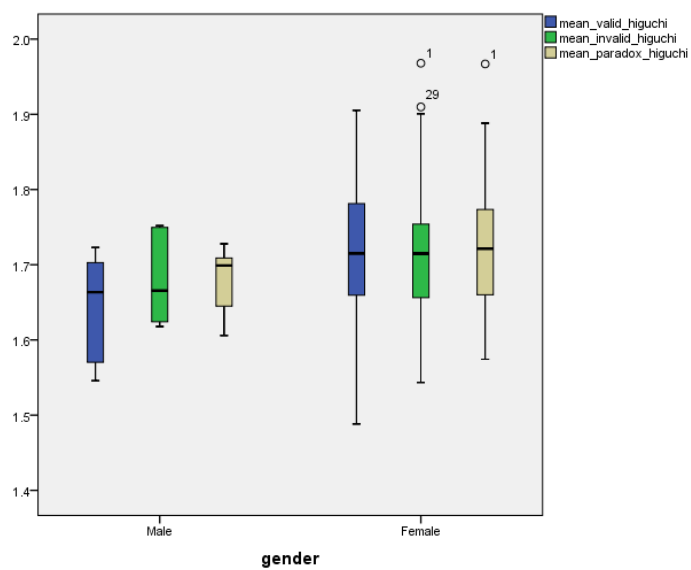

**Figure S4:** Box plot of the distribution of the Grand Mean (across all channels) of the Higuchi FD (per gender).

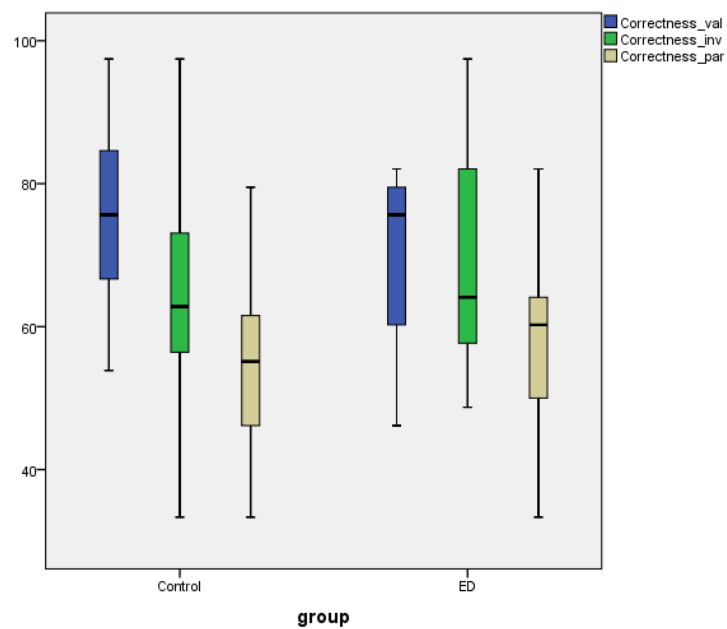

**Figure S5:** Distribution of the % correctness, across syllogisms and groups.

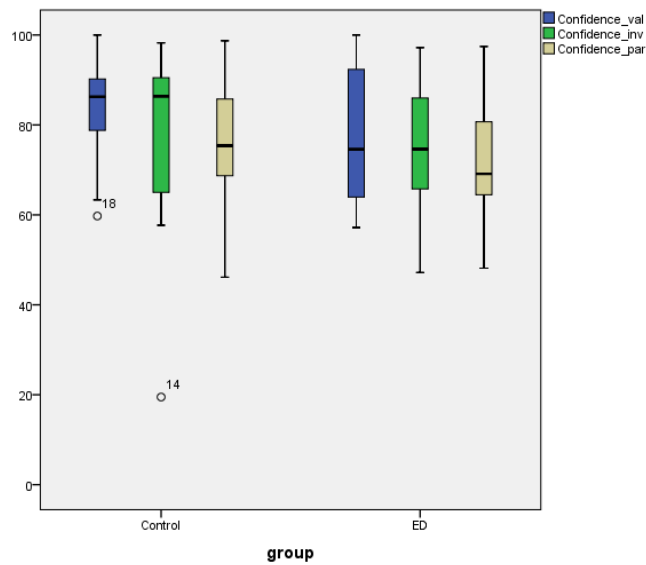

**Figure S6:** Distribution of the % degree of confidence (DoC), across syllogisms and groups.

**Table S9:** Correlation of Behavioral data (emotional intensity, emotional control, mood and number of correct answers) with **AppEn**, **Valid** syllogism, Healthy Controls.

**Correlations**

|                                  |                     | valid_emotional_<br>intensity_AE | valid_emotional_<br>control_AE | valid_mood<br>_AE | valid_correct_<br>answers_AE | mean_valid<br>_AE |
|----------------------------------|---------------------|----------------------------------|--------------------------------|-------------------|------------------------------|-------------------|
| valid_emotional_<br>intensity_AE | Pearson Correlation | 1                                | -0.369                         | -0.323            | -0.064                       | -0.205            |
|                                  | Sig. (2-tailed)     |                                  | 0.053                          | 0.094             | 0.746                        | 0.294             |
|                                  | N                   | 28                               | 28                             | 28                | 28                           | 28                |
| valid_emotional_<br>control_AE   | Pearson Correlation | -0.369                           | 1                              | 0.352             | 0.041                        | 0.096             |
|                                  | Sig. (2-tailed)     | 0.053                            |                                | 0.067             | 0.837                        | 0.626             |
|                                  | N                   | 28                               | 28                             | 28                | 28                           | 28                |
| valid_mood<br>_AE                | Pearson Correlation | -0.323                           | 0.352                          | 1                 | -0.115                       | 0.141             |
|                                  | Sig. (2-tailed)     | 0.094                            | 0.067                          |                   | 0.561                        | 0.476             |
|                                  | N                   | 28                               | 28                             | 28                | 28                           | 28                |
| valid_correct_<br>answers_AE     | Pearson Correlation | -0.064                           | 0.041                          | -0.115            | 1                            | -0.036            |
|                                  | Sig. (2-tailed)     | 0.746                            | 0.837                          | 0.561             |                              | 0.856             |
|                                  | N                   | 28                               | 28                             | 28                | 28                           | 28                |
| mean_valid<br>_AE                | Pearson Correlation | -0.205                           | 0.096                          | 0.141             | -0.036                       | 1                 |
|                                  | Sig. (2-tailed)     | 0.294                            | 0.626                          | 0.476             | 0.856                        |                   |
|                                  | N                   | 28                               | 28                             | 28                | 28                           | 28                |

**Table S10:** Correlation of Behavioral data (emotional intensity, emotional control, mood and number of correct answers) with **AppEn**, **Invalid** syllogism, Healthy Controls.

### Correlations

|                                    |                                             | invalid_emotional_<br>intensity AE | invalid_emotional_<br>control AE | invalid_mood<br>AE      | invalid_correct_<br>answers AE | mean_invalid<br>AE    |
|------------------------------------|---------------------------------------------|------------------------------------|----------------------------------|-------------------------|--------------------------------|-----------------------|
| invalid_emotional_<br>intensity_AE | Pearson Correlation<br>Sig. (2-tailed)<br>N | 1<br>28                            | -0.627**<br>0.000<br>28          | -0.539**<br>0.003<br>28 | -0.452*<br>0.016<br>28         | -0.103<br>0.602<br>28 |
| invalid_emotional_<br>control_AE   | Pearson Correlation<br>Sig. (2-tailed)<br>N | -0.627**<br>0.000<br>28            | 1<br>28                          | 0.480**<br>0.010<br>28  | 0.480**<br>0.010<br>28         | -0.203<br>0.300<br>28 |
| invalid_mood<br>_AE                | Pearson Correlation<br>Sig. (2-tailed)<br>N | -0.539**<br>0.003<br>28            | 0.480**<br>0.010<br>28           | 1<br>28                 | 0.440*<br>0.019<br>28          | 0.089<br>0.654<br>28  |
| invalid_correct_<br>answers_AE     | Pearson Correlation<br>Sig. (2-tailed)<br>N | -0.452*<br>0.016<br>28             | 0.480**<br>0.010<br>28           | 0.440*<br>0.019<br>28   | 1<br>28                        | -0.147<br>0.454<br>28 |
| mean_invalid<br>_AE                | Pearson Correlation<br>Sig. (2-tailed)<br>N | -0.103<br>0.602<br>28              | -0.203<br>0.300<br>28            | 0.089<br>0.654<br>28    | -0.147<br>0.454<br>28          | 1<br>28               |

\*\*, Correlation is significant at the 0.01 level (2-tailed).

\*, Correlation is significant at the 0.05 level (2-tailed).

**Table S11:** Correlation of Behavioral data (emotional intensity, emotional control, mood and number of correct answers) with **AppEn**, *Paradox* syllogism, Healthy Controls.

### Correlations

|                                    |                                             | paradox_emotional_<br>intensity AE | paradox_emotional_<br>control AE | paradox_mood<br>AE    | paradox_correct<br>answers AE | mean_paradox<br>AE    |
|------------------------------------|---------------------------------------------|------------------------------------|----------------------------------|-----------------------|-------------------------------|-----------------------|
| paradox_emotional_<br>intensity_AE | Pearson Correlation<br>Sig. (2-tailed)<br>N | 1<br>28                            | -0.630**<br>0.000<br>28          | -0.325<br>0.092<br>28 | 0.028<br>0.887<br>28          | -0.272<br>0.162<br>28 |
| paradox_emotional_<br>control_AE   | Pearson Correlation<br>Sig. (2-tailed)<br>N | -0.630**<br>0.000<br>28            | 1<br>28                          | 0.311<br>0.107<br>28  | -0.194<br>0.323<br>28         | 0.421*<br>0.026<br>28 |
| paradox_mood<br>_AE                | Pearson Correlation<br>Sig. (2-tailed)<br>N | -0.325<br>0.092<br>28              | 0.311<br>0.107<br>28             | 1<br>28               | -0.244<br>0.211<br>28         | 0.164<br>0.405<br>28  |
| paradox_correct_<br>answers_AE     | Pearson Correlation<br>Sig. (2-tailed)<br>N | 0.028<br>0.887<br>28               | -0.194<br>0.323<br>28            | -0.244<br>0.211<br>28 | 1<br>28                       | -0.067<br>0.734<br>28 |
| mean_paradox<br>_AE                | Pearson Correlation<br>Sig. (2-tailed)<br>N | -0.272<br>0.162<br>28              | 0.421*<br>0.026<br>28            | 0.164<br>0.405<br>28  | -0.067<br>0.734<br>28         | 1<br>28               |

\*\*, Correlation is significant at the 0.01 level (2-tailed).

\*, Correlation is significant at the 0.05 level (2-tailed).

**Table S12:** Correlation of Behavioral data (emotional intensity, emotional control, mood, and number of correct answers) with **AppEn**, *valid* syllogism, AN patients.

### Correlations

|                                  |                                             | valid_emotional_<br>intensity AE | valid_emotional_<br>control AE | valid_mood<br>AE      | valid_correct_<br>answers AE | mean_valid<br>AE      |
|----------------------------------|---------------------------------------------|----------------------------------|--------------------------------|-----------------------|------------------------------|-----------------------|
| valid_emotional_<br>intensity_AE | Pearson Correlation<br>Sig. (2-tailed)<br>N | 1<br>12                          | -0.543<br>0.068<br>12          | -0.535<br>0.073<br>12 | 0.282<br>0.375<br>12         | 0.217<br>0.497<br>12  |
| valid_emotional_<br>control_AE   | Pearson Correlation<br>Sig. (2-tailed)<br>N | -0.543<br>0.068<br>12            | 1<br>12                        | 0.493<br>0.103<br>12  | -0.189<br>0.556<br>12        | -0.048<br>0.883<br>12 |

|                          |                                             |                       |                       |                       |                       |                       |
|--------------------------|---------------------------------------------|-----------------------|-----------------------|-----------------------|-----------------------|-----------------------|
| valid_mood_AE            | Pearson Correlation<br>Sig. (2-tailed)<br>N | -0.535<br>0.073<br>12 | 0.493<br>0.103<br>12  | 1<br>12               | -0.328<br>0.298<br>12 | -0.212<br>0.508<br>12 |
| valid_correct_answers_AE | Pearson Correlation<br>Sig. (2-tailed)<br>N | 0.282<br>0.375<br>12  | -0.189<br>0.556<br>12 | -0.328<br>0.298<br>12 | 1<br>12               | 0.089<br>0.784<br>12  |
| mean_valid_AE            | Pearson Correlation<br>Sig. (2-tailed)<br>N | 0.217<br>0.497<br>12  | -0.048<br>0.883<br>12 | -0.212<br>0.508<br>12 | 0.089<br>0.784<br>12  | 1<br>12               |

**Table S13:** Correlation of Behavioral data (emotional intensity, emotional control, mood, and number of correct answers) with **AppEn**, *Invalid* syllogism, AN patients.

#### Correlations

|                                |                                             | invalid_emotional_intensity_AE | invalid_emotional_control_AE | invalid_mood_AE       | invalid_correct_answers_AE | mean_invalid_AE       |
|--------------------------------|---------------------------------------------|--------------------------------|------------------------------|-----------------------|----------------------------|-----------------------|
| invalid_emotional_intensity_AE | Pearson Correlation<br>Sig. (2-tailed)<br>N | 1<br>12                        | -0.429<br>0.164<br>12        | -0.523<br>0.081<br>12 | -0.466<br>0.126<br>12      | -0.148<br>0.646<br>12 |
| invalid_emotional_control_AE   | Pearson Correlation<br>Sig. (2-tailed)<br>N | -0.429<br>0.164<br>12          | 1<br>12                      | 0.672*<br>0.017<br>12 | 0.100<br>0.756<br>12       | 0.635*<br>0.027<br>12 |
| invalid_mood_AE                | Pearson Correlation<br>Sig. (2-tailed)<br>N | -0.523<br>0.081<br>12          | 0.672*<br>0.017<br>12        | 1<br>12               | 0.049<br>0.879<br>12       | 0.480<br>0.115<br>12  |
| invalid_correct_answers_AE     | Pearson Correlation<br>Sig. (2-tailed)<br>N | -0.466<br>0.126<br>12          | 0.100<br>0.756<br>12         | 0.049<br>0.879<br>12  | 1<br>12                    | -0.167<br>0.603<br>12 |
| mean_invalid_AE                | Pearson Correlation<br>Sig. (2-tailed)<br>N | -0.148<br>0.646<br>12          | 0.635*<br>0.027<br>12        | 0.480<br>0.115<br>12  | -0.167<br>0.603<br>12      | 1<br>12               |

\*. Correlation is significant at the 0.05 level (2-tailed).

**Table S14:** Correlation of Behavioral data (emotional intensity, emotional control, mood, and number of correct answers) with **AppEn**, *Paradox* syllogism, AN patients.

#### Correlations

|                                |                                             | paradox_emotional_intensity_AE | paradox_emotional_control_AE | paradox_mood_AE       | paradox_correct_answers_AE | mean_paradox_AE       |
|--------------------------------|---------------------------------------------|--------------------------------|------------------------------|-----------------------|----------------------------|-----------------------|
| paradox_emotional_intensity_AE | Pearson Correlation<br>Sig. (2-tailed)<br>N | 1<br>12                        | -0.706*<br>0.010<br>12       | -0.243<br>0.447<br>12 | 0.413<br>0.182<br>12       | 0.227<br>0.477<br>12  |
| paradox_emotional_control_AE   | Pearson Correlation<br>Sig. (2-tailed)<br>N | -0.706*<br>0.010<br>12         | 1<br>12                      | 0.587*<br>0.045<br>12 | 0.082<br>0.799<br>12       | -0.530<br>0.076<br>12 |
| paradox_mood_AE                | Pearson Correlation<br>Sig. (2-tailed)<br>N | -0.243<br>0.447<br>12          | 0.587*<br>0.045<br>12        | 1<br>12               | 0.355<br>0.258<br>12       | -0.472<br>0.121<br>12 |
| paradox_correct_answers_AE     | Pearson Correlation<br>Sig. (2-tailed)<br>N | 0.413<br>0.182<br>12           | 0.082<br>0.799<br>12         | 0.355<br>0.258<br>12  | 1<br>12                    | -0.300<br>0.344<br>12 |
| mean_paradox_AE                | Pearson Correlation<br>Sig. (2-tailed)<br>N | 0.227<br>0.477<br>12           | -0.530<br>0.076<br>12        | -0.472<br>0.121<br>12 | -0.300<br>0.344<br>12      | 1<br>12               |

\*. Correlation is significant at the 0.05 level (2-tailed).



**Table S15:** Correlation of Behavioral data (emotional intensity, emotional control, mood, and number of correct answers) with **HFD**, *Valid* syllogism, Healthy Controls.

**Correlations**

|                                  |                                             | valid_emotional_<br>intensity_HI | valid_emotional_<br>control_HI | valid_mood<br>HI      | valid_correct_<br>answers_HI | mean_valid<br>HI      |
|----------------------------------|---------------------------------------------|----------------------------------|--------------------------------|-----------------------|------------------------------|-----------------------|
| valid_emotional_<br>intensity_HI | Pearson Correlation<br>Sig. (2-tailed)<br>N | 1<br>0.053<br>28                 | -0.369<br>0.053<br>28          | -0.323<br>0.094<br>28 | -0.064<br>0.746<br>28        | 0.116<br>0.558<br>28  |
| valid_emotional_<br>control_HI   | Pearson Correlation<br>Sig. (2-tailed)<br>N | -0.369<br>0.053<br>28            | 1<br>0.067<br>28               | 0.352<br>0.067<br>28  | 0.041<br>0.837<br>28         | 0.134<br>0.496<br>28  |
| valid_mood<br>_HI                | Pearson Correlation<br>Sig. (2-tailed)<br>N | -0.323<br>0.094<br>28            | 0.352<br>0.067<br>28           | 1<br>0.067<br>28      | -0.115<br>0.561<br>28        | 0.259<br>0.183<br>28  |
| valid_correct_<br>answers_HI     | Pearson Correlation<br>Sig. (2-tailed)<br>N | -0.064<br>0.746<br>28            | 0.041<br>0.837<br>28           | -0.115<br>0.561<br>28 | 1<br>0.806<br>28             | -0.049<br>0.806<br>28 |
| mean_valid<br>_HI                | Pearson Correlation<br>Sig. (2-tailed)<br>N | 0.116<br>0.558<br>28             | 0.134<br>0.496<br>28           | 0.259<br>0.183<br>28  | -0.049<br>0.806<br>28        | 1<br>0.806<br>28      |

**Table S16:** Correlation of Behavioral data (emotional intensity, emotional control, mood, and number of correct answers) with **HFD**, *Invalid* syllogism, Healthy Controls.

**Correlations**

|                                    |                                             | invalid_emotional_<br>intensity_HI | invalid_emotional_<br>control_HI | invalid_mood<br>HI      | invalid_correct_<br>answers_HI | mean_invalid<br>HI    |
|------------------------------------|---------------------------------------------|------------------------------------|----------------------------------|-------------------------|--------------------------------|-----------------------|
| invalid_emotional_<br>intensity_HI | Pearson Correlation<br>Sig. (2-tailed)<br>N | 1<br>0.000<br>28                   | -0.627**<br>0.000<br>28          | -0.539**<br>0.003<br>28 | -0.452*<br>0.016<br>28         | -0.322<br>0.095<br>28 |
| invalid_emotional_<br>control_HI   | Pearson Correlation<br>Sig. (2-tailed)<br>N | -0.627**<br>0.000<br>28            | 1<br>0.000<br>28                 | 0.480**<br>0.010<br>28  | 0.480**<br>0.010<br>28         | 0.107<br>0.587<br>28  |
| invalid_mood<br>_HI                | Pearson Correlation<br>Sig. (2-tailed)<br>N | -0.539**<br>0.003<br>28            | 0.480**<br>0.010<br>28           | 1<br>0.010<br>28        | 0.440*<br>0.019<br>28          | 0.010<br>0.958<br>28  |
| invalid_correct_<br>answers_HI     | Pearson Correlation<br>Sig. (2-tailed)<br>N | -0.452*<br>0.016<br>28             | 0.480**<br>0.010<br>28           | 0.440*<br>0.019<br>28   | 1<br>0.823<br>28               | -0.044<br>0.823<br>28 |
| mean_invalid<br>_HI                | Pearson Correlation<br>Sig. (2-tailed)<br>N | -0.322<br>0.095<br>28              | 0.107<br>0.587<br>28             | 0.010<br>0.958<br>28    | -0.044<br>0.823<br>28          | 1<br>0.823<br>28      |

\*\*, Correlation is significant at the 0.01 level (2-tailed).

\*, Correlation is significant at the 0.05 level (2-tailed).

**Table S17:** Correlation of Behavioral data (emotional intensity, emotional control, mood, and number of correct answers) with **HFD**, *Paradox* syllogism, Healthy Controls.

### Correlations

|                                    |                                             | paradox_emotional_<br>intensity_HI | paradox_emotional_<br>control_HI | paradox_mood<br>HI    | paradox_correct_<br>answers_HI | mean_paradox<br>HI    |
|------------------------------------|---------------------------------------------|------------------------------------|----------------------------------|-----------------------|--------------------------------|-----------------------|
| paradox_emotional_<br>intensity_HI | Pearson Correlation<br>Sig. (2-tailed)<br>N | 1<br>28                            | -0.630**<br>0.000<br>28          | -0.325<br>0.092<br>28 | 0.028<br>0.887<br>28           | -0.033<br>0.868<br>28 |
| paradox_emotional_<br>control_HI   | Pearson Correlation<br>Sig. (2-tailed)<br>N | -0.630**<br>0.000<br>28            | 1<br>28                          | 0.311<br>0.107<br>28  | -0.194<br>0.323<br>28          | 0.053<br>0.788<br>28  |
| paradox_mood<br>_HI                | Pearson Correlation<br>Sig. (2-tailed)<br>N | -0.325<br>0.092<br>28              | 0.311<br>0.107<br>28             | 1<br>28               | -0.244<br>0.211<br>28          | -0.076<br>0.702<br>28 |
| paradox_correct_<br>answers_HI     | Pearson Correlation<br>Sig. (2-tailed)<br>N | 0.028<br>0.887<br>28               | -0.194<br>0.323<br>28            | -0.244<br>0.211<br>28 | 1<br>28                        | -0.023<br>0.907<br>28 |
| mean_paradox<br>_HI                | Pearson Correlation<br>Sig. (2-tailed)<br>N | -0.033<br>0.868<br>28              | 0.053<br>0.788<br>28             | -0.076<br>0.702<br>28 | -0.023<br>0.907<br>28          | 1<br>28               |

\*\*, Correlation is significant at the 0.01 level (2-tailed).

**Table S18:** Correlation of Behavioral data (emotional intensity, emotional control, mood, and number of correct answers) with **HFD**, **Valid** syllogism, AN patients.

### Correlations

|                                  |                                             | valid_emotional_<br>intensity_HI | valid_emotional_<br>control_HI | valid_mood<br>HI      | valid_correct_<br>answers_HI | mean_valid<br>_HI     |
|----------------------------------|---------------------------------------------|----------------------------------|--------------------------------|-----------------------|------------------------------|-----------------------|
| valid_emotional_<br>intensity_HI | Pearson Correlation<br>Sig. (2-tailed)<br>N | 1<br>12                          | -0.543<br>0.068<br>12          | -0.535<br>0.073<br>12 | 0.282<br>0.375<br>12         | -0.146<br>0.650<br>12 |
| valid_emotional_<br>control_HI   | Pearson Correlation<br>Sig. (2-tailed)<br>N | -0.543<br>0.068<br>12            | 1<br>12                        | 0.493<br>0.103<br>12  | -0.189<br>0.556<br>12        | -0.315<br>0.318<br>12 |
| valid_mood<br>_HI                | Pearson Correlation<br>Sig. (2-tailed)<br>N | -0.535<br>0.073<br>12            | 0.493<br>0.103<br>12           | 1<br>12               | -0.328<br>0.298<br>12        | 0.092<br>0.776<br>12  |
| valid_correct_<br>answers_HI     | Pearson Correlation<br>Sig. (2-tailed)<br>N | 0.282<br>0.375<br>12             | -0.189<br>0.556<br>12          | -0.328<br>0.298<br>12 | 1<br>12                      | 0.346<br>0.270<br>12  |
| mean_valid<br>_HI                | Pearson Correlation<br>Sig. (2-tailed)<br>N | -0.146<br>0.650<br>12            | -0.315<br>0.318<br>12          | 0.092<br>0.776<br>12  | 0.346<br>0.270<br>12         | 1<br>12               |

**Table S19:** Correlation of Behavioral data (emotional intensity, emotional control, mood, and number of correct answers) with **HFD**, **Invalid** syllogism, AN patients.

### Correlations

|                                    |                                             | invalid_emotional_<br>intensity_HI | invalid_emotional_<br>control_HI | invalid_mood<br>HI    | invalid_correct_<br>answers_HI | mean_invalid<br>HI     |
|------------------------------------|---------------------------------------------|------------------------------------|----------------------------------|-----------------------|--------------------------------|------------------------|
| invalid_emotional_<br>intensity_HI | Pearson Correlation<br>Sig. (2-tailed)<br>N | 1<br>12                            | -0.429<br>0.164<br>12            | -0.523<br>0.081<br>12 | -0.466<br>0.126<br>12          | -0.588*<br>0.045<br>12 |
| invalid_emotional_<br>control_HI   | Pearson Correlation<br>Sig. (2-tailed)<br>N | -0.429<br>0.164<br>12              | 1<br>12                          | 0.672*<br>0.017<br>12 | 0.100<br>0.756<br>12           | 0.364<br>0.244<br>12   |
| invalid_mood<br>_HI                | Pearson Correlation<br>Sig. (2-tailed)<br>N | -0.523<br>0.081<br>12              | 0.672*<br>0.017<br>12            | 1<br>12               | 0.049<br>0.879<br>12           | 0.378<br>0.226<br>12   |

|                  |                     |         |       |       |       |       |
|------------------|---------------------|---------|-------|-------|-------|-------|
| invalid_correct_ | Pearson Correlation | -0.466  | 0.100 | 0.049 | 1     | 0.009 |
| answers_HI       | Sig. (2-tailed)     | 0.126   | 0.756 | 0.879 |       | 0.977 |
|                  | N                   | 12      | 12    | 12    | 12    | 12    |
| mean_invalid     | Pearson Correlation | -0.588* | 0.364 | 0.378 | 0.009 | 1     |
| _HI              | Sig. (2-tailed)     | 0.045   | 0.244 | 0.226 | 0.977 |       |
|                  | N                   | 12      | 12    | 12    | 12    | 12    |

\*. Correlation is significant at the 0.05 level (2-tailed).

**Table S20:** Correlation of Behavioral data (emotional intensity, emotional control, mood, and number of correct answers) with **HFD**, **Paradox** syllogism, AN patients.

#### Correlations

|                                    |                     | paradox_emotional_<br>intensity_HI | paradox_emotional_<br>control_HI | paradox_mood<br>_HI | paradox_correct_<br>answers_HI | mean_paradox<br>_HI |
|------------------------------------|---------------------|------------------------------------|----------------------------------|---------------------|--------------------------------|---------------------|
| paradox_emotional_<br>intensity_HI | Pearson Correlation | 1                                  | -0.706*                          | -0.243              | 0.413                          | 0.359               |
|                                    | Sig. (2-tailed)     |                                    | 0.010                            | 0.447               | 0.182                          | 0.252               |
|                                    | N                   | 12                                 | 12                               | 12                  | 12                             | 12                  |
| paradox_emotional_<br>control_HI   | Pearson Correlation | -0.706*                            | 1                                | 0.587*              | 0.082                          | -0.574              |
|                                    | Sig. (2-tailed)     | 0.010                              |                                  | 0.045               | 0.799                          | 0.051               |
|                                    | N                   | 12                                 | 12                               | 12                  | 12                             | 12                  |
| paradox_mood<br>_HI                | Pearson Correlation | -0.243                             | 0.587*                           | 1                   | 0.355                          | -0.244              |
|                                    | Sig. (2-tailed)     | 0.447                              | 0.045                            |                     | 0.258                          | 0.444               |
|                                    | N                   | 12                                 | 12                               | 12                  | 12                             | 12                  |
| paradox_correct_<br>answers_HI     | Pearson Correlation | 0.413                              | 0.082                            | 0.355               | 1                              | 0.284               |
|                                    | Sig. (2-tailed)     | 0.182                              | 0.799                            | 0.258               |                                | 0.371               |
|                                    | N                   | 12                                 | 12                               | 12                  | 12                             | 12                  |
| mean_paradox<br>_HI                | Pearson Correlation | 0.359                              | -0.574                           | -0.244              | 0.284                          | 1                   |
|                                    | Sig. (2-tailed)     | 0.252                              | 0.051                            | 0.444               | 0.371                          |                     |
|                                    | N                   | 12                                 | 12                               | 12                  | 12                             | 12                  |

\*. Correlation is significant at the 0.05 level (2-tailed).

**Table S21:** Correlations of Behavioral Data (% Degree of Confidence, DoC and % Correctness) with AppEn (Spearman's rho, Nonparametric), Healthy Controls.

#### Correlations

|                    |                     |                                                    | mean_val<br>id_<br>AE  | mean_inv<br>alid_<br>AE | mean_<br>parado<br>x_<br>AE | Confiden<br>ce_val     | Confiden<br>ce_inv     | Confiden<br>ce_par     | Correctne<br>ss_val  | Correctne<br>ss_inv  | Correctne<br>ss_par   |
|--------------------|---------------------|----------------------------------------------------|------------------------|-------------------------|-----------------------------|------------------------|------------------------|------------------------|----------------------|----------------------|-----------------------|
| Spearhman's<br>rho | mean_valid_<br>AE   | Correlation<br>Coefficient<br>Sig. (2-tailed)<br>N | 1.000<br>.<br>28       | 0.711**<br>0.000<br>28  | 0.568**<br>0.002<br>28      | 0.180<br>0.360<br>28   | 0.018<br>0.929<br>28   | 0.169<br>0.390<br>28   | 0.010<br>0.961<br>28 | 0.294<br>0.129<br>28 | -0.111<br>0.573<br>28 |
|                    | mean_invali<br>d_AE | Correlation<br>Coefficient<br>Sig. (2-tailed)<br>N | 0.711**<br>0.000<br>28 | 1.000<br>.<br>28        | 0.530**<br>0.004<br>28      | 0.110<br>0.576<br>28   | 0.092<br>0.643<br>28   | 0.095<br>0.632<br>28   | 0.061<br>0.758<br>28 | 0.196<br>0.318<br>28 | -0.078<br>0.694<br>28 |
|                    | mean_parad<br>ox_AE | Correlation<br>Coefficient<br>Sig. (2-tailed)<br>N | 0.568**<br>0.002<br>28 | 0.530**<br>0.004<br>28  | 1.000<br>.<br>28            | 0.157<br>0.426<br>28   | 0.252<br>0.196<br>28   | 0.299<br>0.122<br>28   | 0.180<br>0.359<br>28 | 0.013<br>0.947<br>28 | 0.001<br>0.994<br>28  |
|                    | Confidence_<br>val  | Correlation<br>Coefficient<br>Sig. (2-tailed)<br>N | 0.180<br>0.360<br>28   | 0.110<br>0.576<br>28    | 0.157<br>0.426<br>28        | 1.000<br>.<br>28       | 0.693**<br>0.000<br>28 | 0.848**<br>0.000<br>28 | 0.284<br>0.143<br>28 | 0.052<br>0.791<br>28 | -0.099<br>0.615<br>28 |
|                    | Confidence_<br>inv  | Correlation<br>Coefficient<br>Sig. (2-tailed)<br>N | 0.018<br>0.929<br>28   | 0.092<br>0.643<br>28    | 0.252<br>0.196<br>28        | 0.693**<br>0.000<br>28 | 1.000<br>.<br>28       | 0.779**<br>0.000<br>28 | 0.012<br>0.950<br>28 | 0.290<br>0.135<br>28 | -0.111<br>0.575<br>28 |
|                    | Confidence_<br>par  | Correlation<br>Coefficient<br>Sig. (2-tailed)<br>N | 0.169<br>0.390<br>28   | 0.095<br>0.632<br>28    | 0.299<br>0.122<br>28        | 0.848**<br>0.000<br>28 | 0.779**<br>0.000<br>28 | 1.000<br>.<br>28       | 0.137<br>0.487<br>28 | 0.066<br>0.738<br>28 | -0.167<br>0.397<br>28 |

|                 |                                                 |                       |                       |                      |                       |                       |                       |                         |                         |                        |
|-----------------|-------------------------------------------------|-----------------------|-----------------------|----------------------|-----------------------|-----------------------|-----------------------|-------------------------|-------------------------|------------------------|
| Correctness_val | Correlation Coefficient<br>Sig. (2-tailed)<br>N | 0.010<br>0.961<br>28  | 0.061<br>0.758<br>28  | 0.180<br>0.359<br>28 | 0.284<br>0.143<br>28  | 0.012<br>0.950<br>28  | 0.137<br>0.487<br>28  | 1.000<br>.<br>28        | -0.555**<br>0.002<br>28 | 0.306<br>0.114<br>28   |
| Correctness_inv | Correlation Coefficient<br>Sig. (2-tailed)<br>N | 0.294<br>0.129<br>28  | 0.196<br>0.318<br>28  | 0.013<br>0.947<br>28 | 0.052<br>0.791<br>28  | 0.290<br>0.135<br>28  | 0.066<br>0.738<br>28  | -0.555**<br>0.002<br>28 | 1.000<br>.<br>28        | -0.435*<br>0.021<br>28 |
| Correctness_par | Correlation Coefficient<br>Sig. (2-tailed)<br>N | -0.111<br>0.573<br>28 | -0.078<br>0.694<br>28 | 0.001<br>0.994<br>28 | -0.099<br>0.615<br>28 | -0.111<br>0.575<br>28 | -0.167<br>0.397<br>28 | 0.306<br>0.114<br>28    | -0.435*<br>0.021<br>28  | 1.000<br>.<br>28       |

\*\* . Correlation is significant at the 0.01 level (2-tailed).

\*. Correlation is significant at the 0.05 level (2-tailed).

**Table S22:** Correlations of Behavioral Data (% Degree of Confidence, DoC and % Correctness) with AppEn (Spearman's rho, Nonparametric), AN patients.

**Correlations**

|                    |                 |                                                 | mean_val<br>id_<br>AE  | mean_inv<br>alid_<br>AE | mean_<br>parado<br>x_<br>AE | Confiden<br>ce_val     | Confiden<br>ce_inv     | Confiden<br>ce_par     | Correctne<br>ss_val   | Correctne<br>ss_inv   | Correctne<br>ss_par   |
|--------------------|-----------------|-------------------------------------------------|------------------------|-------------------------|-----------------------------|------------------------|------------------------|------------------------|-----------------------|-----------------------|-----------------------|
| Spearhman's<br>rho | mean_valid_AE   | Correlation Coefficient<br>Sig. (2-tailed)<br>N | 1.000<br>.<br>12       | 0.280<br>0.379<br>12    | 0.524<br>0.080<br>12        | 0.427<br>0.127<br>12   | 0.720**<br>0.008<br>12 | 0.401<br>0.196<br>12   | 0.226<br>0.480<br>12  | -0.246<br>0.440<br>12 | -0.070<br>0.828<br>12 |
|                    | mean_invalid_AE | Correlation Coefficient<br>Sig. (2-tailed)<br>N | 0.280<br>0.379<br>12   | 1.000<br>.<br>12        | 0.350<br>0.265<br>12        | 0.238<br>0.457<br>12   | 0.503<br>0.095<br>12   | 0.190<br>0.554<br>12   | -0.053<br>0.870<br>12 | 0.123<br>0.703<br>12  | -0.112<br>0.728<br>12 |
|                    | mean_paradox_AE | Correlation Coefficient<br>Sig. (2-tailed)<br>N | 0.524<br>0.080<br>12   | 0.350<br>0.265<br>12    | 1.000<br>.<br>12            | 0.336<br>0.286<br>12   | 0.336<br>0.286<br>12   | 0.289<br>0.363<br>12   | 0.155<br>0.629<br>12  | -0.479<br>0.115<br>12 | -0.446<br>0.147<br>12 |
|                    | Confidence_val  | Correlation Coefficient<br>Sig. (2-tailed)<br>N | 0.427<br>0.167<br>12   | 0.238<br>0.457<br>12    | 0.336<br>0.286<br>12        | 1.000<br>.<br>12       | 0.797**<br>0.002<br>12 | 0.986**<br>0.000<br>12 | 0.629*<br>0.028<br>12 | 0.127<br>0.695<br>12  | 0.109<br>0.736<br>12  |
|                    | Confidence_inv  | Correlation Coefficient<br>Sig. (2-tailed)<br>N | 0.720**<br>0.008<br>12 | 0.503<br>0.095<br>12    | 0.336<br>0.286<br>12        | 0.797**<br>0.002<br>12 | 1.000<br>.<br>12       | 0.782**<br>0.003<br>12 | 0.459<br>0.133<br>12  | 0.222<br>0.488<br>12  | 0.077<br>0.812<br>12  |
|                    | Confidence_par  | Correlation Coefficient<br>Sig. (2-tailed)<br>N | 0.401<br>0.196<br>12   | 0.190<br>0.554<br>12    | 0.289<br>0.363<br>12        | 0.986**<br>0.000<br>12 | 0.782**<br>0.003<br>12 | 1.000<br>.<br>12       | 0.680*<br>0.015<br>12 | 0.096<br>0.767<br>12  | 0.205<br>0.523<br>12  |
|                    | Correctness_val | Correlation Coefficient<br>Sig. (2-tailed)<br>N | 0.226<br>0.480<br>12   | -0.053<br>0.870<br>12   | 0.155<br>0.629<br>12        | 0.629*<br>0.028<br>12  | 0.459<br>0.133<br>12   | 0.680*<br>0.015<br>12  | 1.000<br>.<br>12      | -0.203<br>0.527<br>12 | 0.473<br>0.120<br>12  |
|                    | Correctness_inv | Correlation Coefficient<br>Sig. (2-tailed)<br>N | -0.246<br>0.440<br>12  | 0.123<br>0.703<br>12    | -0.479<br>0.115<br>12       | 0.127<br>0.695<br>12   | 0.222<br>0.488<br>12   | 0.096<br>0.767<br>12   | -0.203<br>0.527<br>12 | 1.000<br>.<br>12      | 0.035<br>0.913<br>12  |
|                    | Correctness_par | Correlation Coefficient<br>Sig. (2-tailed)<br>N | -0.070<br>0.828<br>12  | -0.112<br>0.728<br>12   | -0.446<br>0.147<br>12       | 0.109<br>0.736<br>12   | 0.077<br>0.812<br>12   | 0.205<br>0.523<br>12   | 0.473<br>0.120<br>12  | 0.035<br>0.913<br>12  | 1.000<br>.<br>12      |

\*\* . Correlation is significant at the 0.01 level (2-tailed).

\*. Correlation is significant at the 0.05 level (2-tailed).

**Table S23:** Correlations of Behavioral Data (% Degree of Confidence, DoC and % Correctness) with HFD (Spearman's rho, Nonparametric), Healthy Controls.

**Correlations**

|                    |                      |                                                 | mean_val<br>id_<br>higuchi | mean_inv<br>alid_<br>higuchi | mean_<br>parado<br>x_<br>higuchi | Confiden<br>ce_val    | Confiden<br>ce_inv    | Confiden<br>ce_par    | Correctne<br>ss_val  | Correctne<br>ss_inv  | Correctne<br>ss_par   |
|--------------------|----------------------|-------------------------------------------------|----------------------------|------------------------------|----------------------------------|-----------------------|-----------------------|-----------------------|----------------------|----------------------|-----------------------|
| Spearhman's<br>rho | mean_valid_higuchi   | Correlation Coefficient<br>Sig. (2-tailed)<br>N | 1.000<br>.<br>28           | 0.456*<br>0.015<br>28        | 0.528**<br>0.004<br>28           | -0.022<br>0.912<br>28 | -0.135<br>0.493<br>28 | -0.025<br>0.901<br>28 | 0.136<br>0.490<br>28 | 0.007<br>0.973<br>28 | 0.035<br>0.861<br>28  |
|                    | mean_invalid_higuchi | Correlation Coefficient<br>Sig. (2-tailed)<br>N | 0.456*<br>0.015<br>28      | 1.000<br>.<br>28             | 0.719**<br>0.000<br>28           | 0.255<br>0.190<br>28  | 0.254<br>0.192<br>28  | 0.264<br>0.175<br>28  | 0.005<br>0.981<br>28 | 0.195<br>0.321<br>28 | -0.104<br>0.597<br>28 |
|                    | mean_paradox_higuchi | Correlation Coefficient                         | 0.528**<br>0.004           | 0.719**<br>0.000             | 1.000<br>.                       | 0.162<br>0.409        | 0.246<br>0.207        | 0.240<br>0.219        | -0.036<br>0.855      | 0.167<br>0.395       | -0.069<br>0.729       |

|                     |                                                    |                       |                       |                       |                        |                        |                        |                         |                         |                        |
|---------------------|----------------------------------------------------|-----------------------|-----------------------|-----------------------|------------------------|------------------------|------------------------|-------------------------|-------------------------|------------------------|
|                     | Sig. (2-tailed)<br>N                               | 28                    | 28                    | 28                    | 28                     | 28                     | 28                     | 28                      | 28                      | 28                     |
| Confidence_val      | Correlation<br>Coefficient<br>Sig. (2-tailed)<br>N | -0.022<br>0.912<br>28 | 0.255<br>0.190<br>28  | 0.162<br>0.409<br>28  | 1.000<br>.<br>28       | 0.693**<br>0.000<br>28 | 0.848**<br>0.000<br>28 | 0.284<br>0.143<br>28    | 0.052<br>0.791<br>28    | -0.099<br>0.615<br>28  |
| Confidence_inv      | Correlation<br>Coefficient<br>Sig. (2-tailed)<br>N | -0.135<br>0.493<br>28 | 0.254<br>0.192<br>28  | 0.246<br>0.207<br>28  | 0.693**<br>0.000<br>28 | 1.000<br>.<br>28       | 0.779**<br>0.000<br>28 | 0.012<br>0.950<br>28    | 0.290<br>0.135<br>28    | -0.111<br>0.575<br>28  |
| Confidence_par      | Correlation<br>Coefficient<br>Sig. (2-tailed)<br>N | -0.025<br>0.901<br>28 | 0.264<br>0.175<br>28  | 0.240<br>0.219<br>28  | 0.848**<br>0.000<br>28 | 0.779**<br>0.000<br>28 | 1.000<br>.<br>28       | 0.137<br>0.487<br>28    | 0.066<br>0.738<br>28    | -0.167<br>0.397<br>28  |
| Correctness_val     | Correlation<br>Coefficient<br>Sig. (2-tailed)<br>N | 0.136<br>0.490<br>28  | 0.005<br>0.981<br>28  | -0.036<br>0.855<br>28 | 0.284<br>0.143<br>28   | 0.012<br>0.950<br>28   | 0.137<br>0.487<br>28   | 1.000<br>.<br>28        | -0.555**<br>0.002<br>28 | 0.306<br>0.114<br>28   |
| Correctness_in<br>v | Correlation<br>Coefficient<br>Sig. (2-tailed)<br>N | 0.007<br>0.973<br>28  | 0.195<br>0.321<br>28  | 0.167<br>0.395<br>28  | 0.052<br>0.791<br>28   | 0.290<br>0.135<br>28   | 0.066<br>0.738<br>28   | -0.555**<br>0.002<br>28 | 1.000<br>.<br>28        | -0.435*<br>0.021<br>28 |
| Correctness_pa<br>r | Correlation<br>Coefficient<br>Sig. (2-tailed)<br>N | 0.035<br>0.861<br>28  | -0.104<br>0.597<br>28 | -0.069<br>0.729<br>28 | -0.099<br>0.615<br>28  | -0.111<br>0.575<br>28  | -0.167<br>0.397<br>28  | 0.306<br>0.114<br>28    | -0.435*<br>0.021<br>28  | 1.000<br>.<br>28       |

\*. Correlation is significant at the 0.05 level (2-tailed).

\*\*. Correlation is significant at the 0.01 level (2-tailed).

**Table S24:** Correlations of Behavioral Data (% Degree of Confidence, DoC and % Correctness) with HFD (Spearman's rho, Nonparametric), AN patients.

|                    |                          |                                                    | Correlations               |                              |                                      |                        |                        |                        |                       |                       |                      |
|--------------------|--------------------------|----------------------------------------------------|----------------------------|------------------------------|--------------------------------------|------------------------|------------------------|------------------------|-----------------------|-----------------------|----------------------|
|                    |                          |                                                    | mean_val<br>id_<br>higuchi | mean_inv<br>alid_<br>higuchi | mean_<br>parado<br>x_<br>higuch<br>i | Confiden<br>ce_val     | Confiden<br>ce_inv     | Confiden<br>ce_par     | Correctne<br>ss_val   | Correctne<br>ss_inv   | Correctne<br>ss_par  |
| Spearhman's<br>rho | mean_valid_hig<br>uchi   | Correlation<br>Coefficient<br>Sig. (2-tailed)<br>N | 1.000<br>.<br>12           | 0.678*<br>0.015<br>12        | 0.706*<br>0.010<br>12                | -0.126<br>0.697<br>12  | -0.084<br>0.795<br>12  | -0.099<br>0.760<br>12  | 0.244<br>0.445<br>12  | -0.560<br>0.058<br>12 | 0.344<br>0.274<br>12 |
|                    | mean_invalid_h<br>iguchi | Correlation<br>Coefficient<br>Sig. (2-tailed)<br>N | 0.678*<br>0.015<br>12      | 1.000<br>.<br>12             | 0.881**<br>0.000<br>12               | 0.308<br>0.331<br>12   | 0.322<br>0.308<br>12   | 0.331<br>0.293<br>12   | 0.442<br>0.151<br>12  | -0.190<br>0.554<br>12 | 0.102<br>0.753<br>12 |
|                    | mean_paradox_<br>higuchi | Correlation<br>Coefficient<br>Sig. (2-tailed)<br>N | 0.706*<br>0.010<br>12      | 0.881**<br>0.000<br>12       | 1.000<br>.<br>12                     | 0.343<br>0.276<br>12   | 0.259<br>0.417<br>12   | 0.352<br>0.262<br>12   | 0.339<br>0.281<br>12  | -0.208<br>0.517<br>12 | 0.130<br>0.688<br>12 |
|                    | Confidence_val           | Correlation<br>Coefficient<br>Sig. (2-tailed)<br>N | -0.126<br>0.697<br>12      | 0.308<br>0.331<br>12         | 0.343<br>0.276<br>12                 | 1.000<br>.<br>12       | 0.797**<br>0.002<br>12 | 0.986**<br>0.000<br>12 | 0.629*<br>0.028<br>12 | 0.127<br>0.695<br>12  | 0.109<br>0.736<br>12 |
|                    | Confidence_inv           | Correlation<br>Coefficient<br>Sig. (2-tailed)<br>N | -0.084<br>0.795<br>12      | 0.322<br>0.308<br>12         | 0.259<br>0.417<br>12                 | 0.797**<br>0.002<br>12 | 1.000<br>.<br>12       | 0.782**<br>0.003<br>12 | 0.459<br>0.133<br>12  | 0.222<br>0.488<br>12  | 0.077<br>0.812<br>12 |
|                    | Confidence_par           | Correlation<br>Coefficient<br>Sig. (2-tailed)<br>N | -0.099<br>0.760<br>12      | 0.331<br>0.293<br>12         | 0.352<br>0.262<br>12                 | 0.986**<br>0.000<br>12 | 0.782**<br>0.003<br>12 | 1.000<br>.<br>12       | 0.680*<br>0.015<br>12 | 0.096<br>0.767<br>12  | 0.205<br>0.523<br>12 |
|                    | Correctness_val          | Correlation<br>Coefficient<br>Sig. (2-tailed)<br>N | 0.244<br>0.445<br>12       | 0.442<br>0.151<br>12         | 0.339<br>0.281<br>12                 | 0.629*<br>0.028<br>12  | 0.459<br>0.133<br>12   | 0.680*<br>0.015<br>12  | 1.000<br>.<br>12      | -0.203<br>0.527<br>12 | 0.473<br>0.120<br>12 |
|                    | Correctness_in<br>v      | Correlation<br>Coefficient<br>Sig. (2-tailed)<br>N | -0.560<br>0.058<br>12      | -0.190<br>0.554<br>12        | -0.208<br>0.517<br>12                | 0.127<br>0.695<br>12   | 0.222<br>0.488<br>12   | 0.096<br>0.767<br>12   | -0.203<br>0.527<br>12 | 1.000<br>.<br>12      | 0.035<br>0.913<br>12 |
|                    | Correctness_pa<br>r      | Correlation<br>Coefficient<br>Sig. (2-tailed)<br>N | 0.344<br>0.274<br>12       | 0.102<br>0.753<br>12         | 0.130<br>0.688<br>12                 | 0.109<br>0.736<br>12   | 0.077<br>0.812<br>12   | 0.205<br>0.523<br>12   | 0.473<br>0.120<br>12  | 0.035<br>0.913<br>12  | 1.000<br>.<br>12     |

\*\*. Correlation is significant at the 0.01 level (2-tailed).

\*. Correlation is significant at the 0.05 level (2-tailed).

**Table S25:** Independent samples t-test of % DoC and % Correctness.

| Variable    | t     | df | p-value                       |
|-------------|-------|----|-------------------------------|
| % DoC_valid | 1.615 | 38 | 0.057<br>partial<br>(0.115/2) |

|                        |       |    |                               |
|------------------------|-------|----|-------------------------------|
| %<br>Correctness_Valid | 1.595 | 38 | 0.059<br>Partial<br>(0.119/2) |
|------------------------|-------|----|-------------------------------|

**Table S26:** Kruskal-Wallis test for the AppEn, valid syllogism.

Test Statistics<sup>a,b</sup>

|                | Ch1_v<br>alid | Ch2_va<br>lid | Ch3_va<br>lid | Ch4_va<br>lid | Ch5_va<br>lid | Ch6_va<br>lid | Ch7_va<br>lid | Ch8_va<br>lid | Ch9_va<br>lid | Ch10_v<br>alid | Ch11_v<br>alid | Ch12_v<br>alid | Ch13_v<br>alid | Ch14_v<br>alid |
|----------------|---------------|---------------|---------------|---------------|---------------|---------------|---------------|---------------|---------------|----------------|----------------|----------------|----------------|----------------|
| Chi-Square     | 1.258         | 2.447         | 8.028         | 3.348         | 8.028         | 8.028         | 6.001         | 4.268         | 7.534         | 9.063          | 5.031          | 3.457          | 4.268          | 2.178          |
| df             | 1             | 1             | 1             | 1             | 1             | 1             | 1             | 1             | 1             | 1              | 1              | 1              | 1              | 1              |
| Asymp.<br>Sig. | 0.262         | 0.118         | 0.005         | 0.067         | 0.005         | 0.005         | 0.014         | 0.039         | 0.006         | 0.003          | 0.025          | 0.063          | 0.039          | 0.140          |

a. Kruskal Wallis Test  
b. Grouping Variable: group

**Table S27:** Kruskal-Wallis test for AppEn, the invalid syllogism.

Test Statistics<sup>a,b</sup>

|                | Ch1_inva<br>lid | Ch2_inva<br>lid | Ch3_in<br>valid | Ch4_in<br>valid | Ch5_in<br>valid | Ch6_in<br>valid | Ch7_in<br>valid | Ch8_in<br>valid | Ch9_in<br>valid | Ch10_in<br>valid | Ch11_inv<br>alid | Ch12_inv<br>alid | Ch13_inv<br>alid | Ch14_inv<br>alid |
|----------------|-----------------|-----------------|-----------------|-----------------|-----------------|-----------------|-----------------|-----------------|-----------------|------------------|------------------|------------------|------------------|------------------|
| Chi-Square     | 9.422           | 9.973           | 11.123          | 10.540          | 17.073          | 17.564          | 13.829          | 11.520          | 10.540          | 13.829           | 8.711            | 8.711            | 12.129           | 6.900            |
| df             | 1               | 1               | 1               | 1               | 1               | 1               | 1               | 1               | 1               | 1                | 1                | 1                | 1                | 1                |
| Asymp.<br>Sig. | 0.002           | 0.002           | 0.001           | 0.001           | 0.000           | 0.000           | 0.000           | 0.001           | 0.001           | 0.000            | 0.003            | 0.003            | 0.000            | 0.009            |

a. Kruskal Wallis Test  
b. Grouping Variable: group

**Table S28:** Kruskal-Wallis test for the AppEn, paradox syllogism.

Test Statistics<sup>a,b</sup>

|                | Ch1_para<br>dox | Ch2_para<br>dox | Ch3_para<br>dox | Ch4_para<br>dox | Ch5_para<br>dox | Ch6_para<br>dox | Ch7_para<br>dox | Ch8_para<br>dox | Ch9_para<br>dox | Ch10_par<br>adox | Ch11_par<br>adox | Ch12_par<br>adox | Ch13_par<br>adox | Ch14_par<br>adox |
|----------------|-----------------|-----------------|-----------------|-----------------|-----------------|-----------------|-----------------|-----------------|-----------------|------------------|------------------|------------------|------------------|------------------|
| Chi-Square     | 3.136           | 2.635           | 3.348           | 7.056           | 6.746           | 4.516           | 5.715           | 7.373           | 8.537           | 8.366            | 3.794            | 6.593            | 5.575            | 0.223            |
| df             | 1               | 1               | 1               | 1               | 1               | 1               | 1               | 1               | 1               | 1                | 1                | 1                | 1                | 1                |
| Asymp.<br>Sig. | 0.077           | 0.105           | 0.067           | 0.008           | 0.009           | 0.034           | 0.017           | 0.007           | 0.003           | 0.004            | 0.051            | 0.010            | 0.018            | 0.637            |

a. Kruskal Wallis Test  
b. Grouping Variable: group

**Table S29:** Non-parametric, Kruskal-Wallis test for the *Grand mean values* of AppEn.

### Test Statistics<sup>a,b</sup>

|             | mean_valid_AE | mean_invalid_AE | mean_paradox_AE |
|-------------|---------------|-----------------|-----------------|
| Chi-Square  | 8.028         | 15.409          | 6.900           |
| df          | 1             | 1               | 1               |
| Asymp. Sig. | 0.005         | 0.000           | 0.009           |

- Kruskal Wallis Test
- Grouping Variable: group

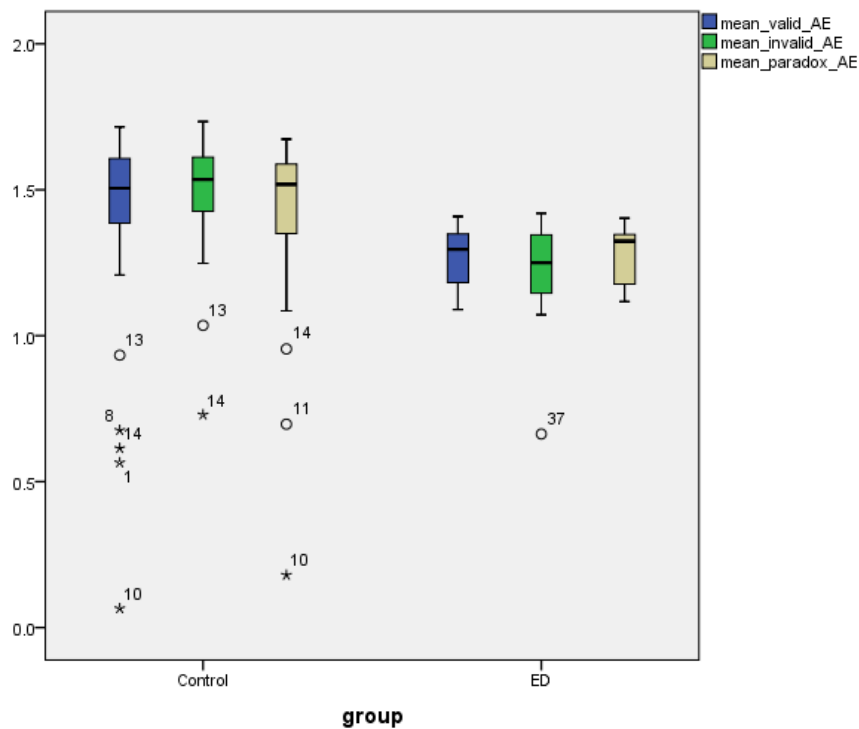

**Figure S7:** Box plot of Grand mean AppEn values for the two groups, across 14 channels, all syllogisms.

**Table S30:** Kruskal-Wallis Test of EEG Alpha rhythm, valid syllogism.

Test Statistics<sup>a,b</sup>

|                  | Chi1_v<br>alid | Chi2_va<br>lid | Chi3_va<br>lid | Chi4_va<br>lid | Chi5_va<br>lid | Chi6_va<br>lid | Chi7_va<br>lid | Chi8_va<br>lid | Chi9_va<br>lid | Chi10_v<br>alid | Chi11_v<br>alid | Chi12_v<br>alid | Chi13_v<br>alid | Chi14_v<br>alid |
|------------------|----------------|----------------|----------------|----------------|----------------|----------------|----------------|----------------|----------------|-----------------|-----------------|-----------------|-----------------|-----------------|
| Chi-Square<br>df | 0.440<br>1     | 0.408<br>1     | 0.133<br>1     | 0.052<br>1     | 1.462<br>1     | 0.079<br>1     | 0.001<br>1     | 0.284<br>1     | 0.317<br>1     | 3.351<br>1      | 0.079<br>1      | 0.050<br>1      | 0.756<br>1      | 3.641<br>1      |

|             |       |       |       |       |       |       |       |       |       |       |       |       |       |       |
|-------------|-------|-------|-------|-------|-------|-------|-------|-------|-------|-------|-------|-------|-------|-------|
| Asymp. Sig. | 0.507 | 0.523 | 0.715 | 0.820 | 0.227 | 0.778 | 0.978 | 0.594 | 0.573 | 0.067 | 0.779 | 0.823 | 0.385 | 0.056 |
|-------------|-------|-------|-------|-------|-------|-------|-------|-------|-------|-------|-------|-------|-------|-------|

a. Kruskal-Wallis Test  
b. Grouping Variable: group

**Table S31:** Kruskal-Wallis Test of EEG Alpha rhythm, invalid syllogism.

Test Statistics<sup>a,b</sup>

|             | Ch1_invalid | Ch2_invalid | Ch3_invalid | Ch4_invalid | Ch5_invalid | Ch6_invalid | Ch7_invalid | Ch8_invalid | Ch9_invalid | Ch10_invalid | Ch11_invalid | Ch12_invalid | Ch13_invalid | Ch14_invalid |
|-------------|-------------|-------------|-------------|-------------|-------------|-------------|-------------|-------------|-------------|--------------|--------------|--------------|--------------|--------------|
| Chi-Square  | 0.293       | 1.899       | 0.013       | 2.679       | 0.016       | 0.535       | 0.720       | 0.231       | 3.964       | 2.551        | 0.079        | 3.749        | 1.180        | 0.064        |
| df          | 1           | 1           | 1           | 1           | 1           | 1           | 1           | 1           | 1           | 1            | 1            | 1            | 1            | 1            |
| Asymp. Sig. | 0.589       | 0.168       | 0.910       | 0.102       | 0.899       | 0.465       | 0.396       | 0.631       | 0.046       | 0.110        | 0.778        | 0.053        | 0.277        | 0.800        |

a. Kruskal-Wallis Test  
b. Grouping Variable: group

**Table S32:** Kruskal-Wallis Test of EEG Alpha rhythm, paradox syllogism.

Test Statistics<sup>a,b</sup>

|             | Ch1_paradox | Ch2_paradox | Ch3_paradox | Ch4_paradox | Ch5_paradox | Ch6_paradox | Ch7_paradox | Ch8_paradox | Ch9_paradox | Ch10_paradox | Ch11_paradox | Ch13_paradox | Ch14_paradox |
|-------------|-------------|-------------|-------------|-------------|-------------|-------------|-------------|-------------|-------------|--------------|--------------|--------------|--------------|
| Chi-Square  | 0.620       | 3.999       | 1.812       | 0.154       | 0.781       | 0.273       | 0.064       | 0.096       | 0.618       | 3.976        | 4.420        | 0.058        | 4.244        |
| df          | 1           | 1           | 1           | 1           | 1           | 1           | 1           | 1           | 1           | 1            | 1            | 1            | 1            |
| Asymp. Sig. | 0.431       | 0.046       | 0.178       | 0.694       | 0.377       | 0.602       | 0.800       | 0.757       | 0.432       | 0.046        | 0.036        | 0.810        | 0.039        |

a. Kruskal-Wallis Test  
b. Grouping Variable: group

**Table S33:** Kruskal-Wallis Test of EEG Beta rhythm, valid syllogism.

Test Statistics<sup>a,b</sup>

|             | Ch1_valid | Ch2_valid | Ch3_valid | Ch4_valid | Ch5_valid | Ch6_valid | Ch7_valid | Ch8_valid | Ch9_valid | Ch10_valid | Ch11_valid | Ch12_valid | Ch13_valid | Ch14_valid |
|-------------|-----------|-----------|-----------|-----------|-----------|-----------|-----------|-----------|-----------|------------|------------|------------|------------|------------|
| Chi-Square  | 5.375     | 0.113     | 7.020     | 5.860     | 0.000     | 0.017     | 0.409     | 2.570     | 0.205     | 2.081      | 7.440      | 0.252      | 0.276      | 2.843      |
| df          | 1         | 1         | 1         | 1         | 1         | 1         | 1         | 1         | 1         | 1          | 1          | 1          | 1          | 1          |
| Asymp. Sig. | 0.020     | 0.736     | 0.008     | 0.015     | 1.000     | 0.897     | 0.522     | 0.109     | 0.651     | 0.149      | 0.006      | 0.616      | 0.600      | 0.092      |

a. Kruskal-Wallis Test  
b. Grouping Variable: group

**Table S34:** Kruskal-Wallis Test of EEG Beta rhythm, invalid syllogism.

Test Statistics<sup>a,b</sup>

|             | Ch1_invalid | Ch2_invalid | Ch3_invalid | Ch4_invalid | Ch5_invalid | Ch6_invalid | Ch7_invalid | Ch8_invalid | Ch9_invalid | Ch10_invalid | Ch11_invalid | Ch12_invalid | Ch13_invalid | Ch14_invalid |
|-------------|-------------|-------------|-------------|-------------|-------------|-------------|-------------|-------------|-------------|--------------|--------------|--------------|--------------|--------------|
| Chi-Square  | 5.474       | 0.149       | 2.942       | 0.137       | 1.032       | 4.141       | 0.054       | 0.993       | 0.164       | 1.241        | 2.177        | 0.294        | 2.109        | 2.637        |
| df          | 1           | 1           | 1           | 1           | 1           | 1           | 1           | 1           | 1           | 1            | 1            | 1            | 1            | 1            |
| Asymp. Sig. | 0.019       | 0.700       | 0.086       | 0.711       | 0.310       | 0.042       | 0.816       | 0.319       | 0.686       | 0.265        | 0.140        | 0.588        | 0.146        | 0.104        |

a. Kruskal-Wallis Test  
b. Grouping Variable: group

**Table S35:** Kruskal-Wallis Test of EEG Beta rhythm, paradox syllogism.

Test Statistics<sup>a,b</sup>

|  | Ch1_paradox | Ch2_paradox | Ch3_paradox | Ch4_paradox | Ch5_paradox | Ch6_paradox | Ch7_paradox | Ch8_paradox | Ch9_paradox | Ch10_paradox | Ch11_paradox | Ch12_paradox | Ch13_paradox | Ch14_paradox |
|--|-------------|-------------|-------------|-------------|-------------|-------------|-------------|-------------|-------------|--------------|--------------|--------------|--------------|--------------|
|--|-------------|-------------|-------------|-------------|-------------|-------------|-------------|-------------|-------------|--------------|--------------|--------------|--------------|--------------|



|             |       |       |       |       |       |       |       |       |       |       |       |       |       |       |
|-------------|-------|-------|-------|-------|-------|-------|-------|-------|-------|-------|-------|-------|-------|-------|
| Chi-Square  | 2.344 | 0.743 | 2.451 | 1.441 | 1.642 | 1.238 | 0.409 | 0.039 | 1.636 | 0.673 | 0.040 | 0.338 | 0.647 | 0.024 |
| df          | 1     | 1     | 1     | 1     | 1     | 1     | 1     | 1     | 1     | 1     | 1     | 1     | 1     | 1     |
| Asymp. Sig. | 0.126 | 0.389 | 0.117 | 0.230 | 0.200 | 0.266 | 0.522 | 0.043 | 0.201 | 0.412 | 0.842 | 0.561 | 0.421 | 0.876 |

a. Kruskal-Wallis Test  
b. Grouping Variable: group

**Table S36: Kruskal-Wallis Test of EEG Delta rhythm, valid syllogism.**

Test Statistics<sup>a,b</sup>

|             | Ch1_v<br>alid | Ch2_va<br>lid | Ch3_va<br>lid | Ch4_va<br>lid | Ch5_va<br>lid | Ch6_va<br>lid | Ch7_va<br>lid | Ch8_va<br>lid | Ch9_va<br>lid | Ch10_v<br>alid | Ch11_v<br>alid | Ch12_v<br>alid | Ch13_v<br>alid | Ch14_v<br>alid |
|-------------|---------------|---------------|---------------|---------------|---------------|---------------|---------------|---------------|---------------|----------------|----------------|----------------|----------------|----------------|
| Chi-Square  | 1.133         | 0.133         | 0.007         | 0.000         | 0.531         | 0.078         | 1.256         | 2.374         | 0.572         | 0.064          | 0.227          | 0.133          | 0.113          | 0.615          |
| df          | 1             | 1             | 1             | 1             | 1             | 1             | 1             | 1             | 1             | 1              | 1              | 1              | 1              | 1              |
| Asymp. Sig. | 0.287         | 0.716         | 0.933         | 1.000         | 0.466         | 0.779         | 0.262         | 0.123         | 0.449         | 0.801          | 0.634          | 0.716          | 0.737          | 0.433          |

a. Kruskal-Wallis Test  
b. Grouping Variable: group

**Table S37: Kruskal-Wallis Test of EEG Delta rhythm, invalid syllogism.**

Test Statistics<sup>a,b</sup>

|             | Ch1_inva<br>lid | Ch2_inva<br>lid | Ch3_in<br>valid | Ch4_in<br>valid | Ch5_in<br>valid | Ch6_in<br>valid | Ch7_in<br>valid | Ch8_in<br>valid | Ch9_in<br>valid | Ch10_in<br>valid | Ch11_inv<br>alid | Ch12_inv<br>alid | Ch13_inv<br>alid | Ch14_inv<br>alid |
|-------------|-----------------|-----------------|-----------------|-----------------|-----------------|-----------------|-----------------|-----------------|-----------------|------------------|------------------|------------------|------------------|------------------|
| Chi-Square  | 0.038           | 0.346           | 0.804           | 0.113           | 2.826           | 0.452           | 0.660           | 0.227           | 0.254           | 0.020            | 0.154            | 1.075            | 0.227            | 1.590            |
| df          | 1               | 1               | 1               | 1               | 1               | 1               | 1               | 1               | 1               | 1                | 1                | 1                | 1                | 1                |
| Asymp. Sig. | 0.845           | 0.556           | 0.370           | 0.737           | 0.093           | 0.501           | 0.416           | 0.634           | 0.614           | 0.889            | 0.695            | 0.300            | 0.634            | 0.207            |

a. Kruskal-Wallis Test  
b. Grouping Variable: group

**Table S38: Kruskal-Wallis Test of EEG Delta rhythm, paradox syllogism.**

Test Statistics<sup>a,b</sup>

|             | Ch1_para<br>dox | Ch2_para<br>dox | Ch3_para<br>dox | Ch4_para<br>dox | Ch5_para<br>dox | Ch6_para<br>dox | Ch7_para<br>dox | Ch8_para<br>dox | Ch9_para<br>dox | Ch10_par<br>adox | Ch11_par<br>adox | Ch12_par<br>adox | Ch13_par<br>adox | Ch14_par<br>adox |
|-------------|-----------------|-----------------|-----------------|-----------------|-----------------|-----------------|-----------------|-----------------|-----------------|------------------|------------------|------------------|------------------|------------------|
| Chi-Square  | 0.078           | 1.520           | 0.095           | 0.154           | 6.358           | 1.451           | 1.194           | 0.254           | 2.042           | 0.346            | 0.615            | 0.415            | 1.075            | 0.001            |
| df          | 1               | 1               | 1               | 1               | 1               | 1               | 1               | 1               | 1               | 1                | 1                | 1                | 1                | 1                |
| Asymp. Sig. | 0.779           | 0.218           | 0.758           | 0.695           | 0.012           | 0.228           | 0.275           | 0.614           | 0.153           | 0.556            | 0.433            | 0.519            | 0.300            | 0.978            |

a. Kruskal-Wallis Test  
b. Grouping Variable: group

**Table S39: Kruskal-Wallis Test of EEG Theta rhythm, valid syllogism.**

Test Statistics<sup>a,b</sup>

|             | Ch1_v<br>alid | Ch2_va<br>lid | Ch3_va<br>lid | Ch4_va<br>lid | Ch5_va<br>lid | Ch6_va<br>lid | Ch7_va<br>lid | Ch8_va<br>lid | Ch9_va<br>lid | Ch10_v<br>alid | Ch11_v<br>alid | Ch12_v<br>alid | Ch13_v<br>alid | Ch14_v<br>alid |
|-------------|---------------|---------------|---------------|---------------|---------------|---------------|---------------|---------------|---------------|----------------|----------------|----------------|----------------|----------------|
| Chi-Square  | 0.234         | 0.020         | 0.016         | 0.021         | 2.436         | 0.096         | 1.112         | 0.491         | 0.020         | 0.013          | 0.034          | 0.815          | 0.002          | 1.742          |
| df          | 1             | 1             | 1             | 1             | 1             | 1             | 1             | 1             | 1             | 1              | 1              | 1              | 1              | 1              |
| Asymp. Sig. | 0.628         | 0.888         | 0.899         | 0.885         | 0.119         | 0.756         | 0.292         | 0.483         | 0.888         | 0.911          | 0.854          | 0.367          | 0.966          | 0.187          |

a. Kruskal-Wallis Test  
b. Grouping Variable: group

**Table S40: Kruskal-Wallis Test of EEG Theta rhythm, invalid syllogism.**

Test Statistics<sup>a,b</sup>

|             | Ch1_invalid | Ch2_invalid | Ch3_invalid | Ch4_invalid | Ch5_invalid | Ch6_invalid | Ch7_invalid | Ch8_invalid | Ch9_invalid | Ch10_invalid | Ch11_invalid | Ch12_invalid | Ch13_invalid | Ch14_invalid |
|-------------|-------------|-------------|-------------|-------------|-------------|-------------|-------------|-------------|-------------|--------------|--------------|--------------|--------------|--------------|
| Chi-Square  | 0.029       | 5.103       | 0.010       | 0.965       | 0.758       | 0.126       | 2.788       | 4.087       | 2.867       | 0.785        | 5.699        | 1.146        | 3.249        | 4.034        |
| df          | 1           | 1           | 1           | 1           | 1           | 1           | 1           | 1           | 1           | 1            | 1            | 1            | 1            | 1            |
| Asymp. Sig. | 0.865       | 0.024       | 0.922       | 0.326       | 0.384       | 0.723       | 0.095       | 0.043       | 0.090       | 0.376        | 0.017        | 0.284        | 0.071        | 0.045        |

a. Kruskal Wallis Test  
b. Grouping Variable: group

**Table S41:** Kruskal-Wallis Test of EEG Theta rhythm, paradox syllogism.

Test Statistics<sup>a, b</sup>

|             | Ch1_paradox | Ch2_paradox | Ch3_paradox | Ch4_paradox | Ch5_paradox | Ch6_paradox | Ch7_paradox | Ch8_paradox | Ch9_paradox | Ch10_paradox | Ch11_paradox | Ch12_paradox | Ch13_paradox | Ch14_paradox |
|-------------|-------------|-------------|-------------|-------------|-------------|-------------|-------------|-------------|-------------|--------------|--------------|--------------|--------------|--------------|
| Chi-Square  | 3.239       | 0.114       | 0.711       | 2.692       | 0.013       | 0.001       | 0.013       | 0.144       | 0.064       | 0.064        | 0.114        | 1.069        | 0.457        | 0.020        |
| df          | 1           | 1           | 1           | 1           | 1           | 1           | 1           | 1           | 1           | 1            | 1            | 1            | 1            | 1            |
| Asymp. Sig. | 0.072       | 0.735       | 0.399       | 0.101       | 0.910       | 0.978       | 0.910       | 0.704       | 0.800       | 0.800        | 0.735        | 0.301        | 0.499        | 0.887        |

a. Kruskal Wallis Test  
b. Grouping Variable: group
